# Supplementary material for: The C. elegans Discoidin Domain Receptor DDR-2 Modulates the Met-like RTK–JNK Signaling Pathway in Axon Regeneration
Source: PubMed Central journal article supplement (PMC5161311; doi:10.1371/journal.pgen.1006475), 2016-12-16
Supplement: pgen.1006475.s001.pdf [file pgen.1006475.s001.pdf]

**A**

\*

|                         |     |                                                                                    |
|-------------------------|-----|------------------------------------------------------------------------------------|
| <i>C. elegans</i> DDR-2 | 24  | ECSHQLGMSNRKIRDEQISASSSFDLQSTGPQHARAHQESGSGAWCPKNQINSLS-KEWLQISFSVDTVITSVETQGRFD   |
| Human DDR2              | 29  | ICRYPLGMSGGQIPDEDITASSQWS-ESTAAKYGRLDSEEGDGAWCPEIPVEPDDLKEFLQIDLHTLHFITLVGTQGRHA   |
| <i>C. elegans</i> DDR-2 | 103 | DGRGMEYATAFKIQYWRPSLNAWASYKDDFELETIPANNDTEHAIRRHLDRAIIARRIRIVPVSNSSTRVCMRVEVFGCP   |
| Human DDR2              | 108 | GGHGIEFAPMYKINYSRDG-TRWISWRNRHGKQVLDGNSNPYDIFLKDLEPPIVARFVRFIPVTDHSMNVCMRVELYGCV   |
| <i>C. elegans</i> DDR-2 | 188 | FDDSLVFYN---VDQGDLOSG-ISY-HDFSYDGNLANSPLHTGGIGKLYDGEVKGNNVFNH--HKW-----VGWRRKR-    |
| Human DDR2              | 187 | WLDGLVSYNAPAGQQFVLPGGSI IYLNDSVYDGA VGYS--MTEGLGQLTDGVSGLDDFTQTHEYHVWPGYDYVGWRNESA |
| <i>C. elegans</i> DDR-2 | 255 | -NGNVKLAFEFSELRNISGILIHTSNEFKKSAKAFSSATVLF SINGKDFSDTIVHFNNPEDTESEVPRWIRIPVNNRIAK  |
| Human DDR2              | 265 | TNGYIEIMFEFDRIRNFTTMKVHCNNMFAKGVKIFKEVQCYRSEASEWEPNAISFPLVLDDVNPSARFVTVPLHHRMAS    |
| <i>C. elegans</i> DDR-2 | 334 | VAKIRLNFGTDSDWLFISEVNFESNH                                                         |
| Human DDR2              | 345 | AIKCQYHF-ADT-WMMFSEITFQSDA                                                         |

**B**

\*

|                         |     |                                                                                |
|-------------------------|-----|--------------------------------------------------------------------------------|
| <i>C. elegans</i> DDR-2 | 532 | LICVSRIGQGEFGEVDLCQLENRK-----VAVKKLHGISOADEFS-FHREIRVLGSLKHPNVV                |
| Human DDR2              | 567 | LTFKEKLGEGQFGEVHLCVEVEGMEKFKDKDFALDVSANQPVLVAVKMLRADANKNARNDFLKEIKIMSRLKDPNII  |
| <i>C. elegans</i> DDR-2 | 589 | EVVGVCTIQKPILC-IMEYMENGLKSYILK-NPTIQTSQCI-SIC-TQL-----AAGLAYLESCNFVHRDIAA      |
| Human DDR2              | 643 | HLLAVCITDDP-LCMITEYMENGLNQLFSRHEPPNSSSSDVRTVSYTNLKFMTQIASGMKYLSSLNLFVHRDLAT    |
| <i>C. elegans</i> DDR-2 | 654 | RNCLVDGEGNVKIADFGMARSLYSQEYYKVEGKFVLP IRWMAWEALLGKFSTASDVWGFVGMWEIFSLCSEKPY    |
| Human DDR2              | 718 | RNCLVGKNYTIKIADFGMSRNLYSGDY YRIQGRAVLP IRWMSWESILLGKFTTASDVWAFGVTLWETFTFCQEQPY |
| <i>C. elegans</i> DDR-2 | 730 | SDMTDDDVVENLQSMSSTGSLKQVLSRPRMCP SKLYNEQILPCWNYESSRRPSFENVHLHL                 |
| Human DDR2              | 794 | SQLSDEQVIENTGEFFRDQGRQTYLPQPAICPDSVYK-LMLSCWRRDTKNRPSFOEIHLLL                  |
