# Supplementary material for: The C. elegans Discoidin Domain Receptor DDR-2 Modulates the Met-like RTK–JNK Signaling Pathway in Axon Regeneration
Source: PubMed Central journal article supplement (PMC5161311; doi:10.1371/journal.pgen.1006475), 2016-12-16

*Punc-25::nes::cfp*

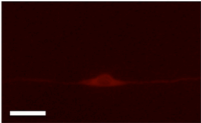

*Pddr-2::nls::venus*

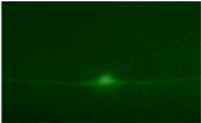

Merge

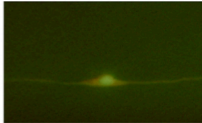

Supplement: pgen.1006475.s002.pdf [file pgen.1006475.s002.pdf]
