# Supplementary material for: The C. elegans Discoidin Domain Receptor DDR-2 Modulates the Met-like RTK–JNK Signaling Pathway in Axon Regeneration
Source: PubMed Central journal article supplement (PMC5161311; doi:10.1371/journal.pgen.1006475), 2016-12-16

FLAG-DDR-2C

-

+

T7-SHC-1

+

+

IP: FLAG

IB: T7

IB: FLAG

← FLAG-DDR-2C

WCE

IB: T7

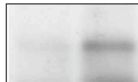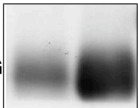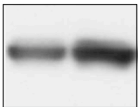

Supplement: pgen.1006475.s003.pdf [file pgen.1006475.s003.pdf]
