# Supplementary material for: The C. elegans Discoidin Domain Receptor DDR-2 Modulates the Met-like RTK–JNK Signaling Pathway in Axon Regeneration
Source: PubMed Central journal article supplement (PMC5161311; doi:10.1371/journal.pgen.1006475), 2016-12-16
Supplement: pgen.1006475.s004.pdf [file pgen.1006475.s004.pdf]

**S1 Table**

| Strain  | Genotype ( <i>juls76</i> background)           | Regeneration    | Total           | % of regeneration | P value             |
|---------|------------------------------------------------|-----------------|-----------------|-------------------|---------------------|
| KU501   | wild type                                      | 52              | 71              | 73                | -                   |
| KU1224  | <i>ddr-1(ok874)</i>                            | 31              | 55              | 56                | 0.059 <sup>a</sup>  |
| KU1201  | <i>ddr-2(ok574)</i>                            | 28              | 75              | 37                | <0.001 <sup>a</sup> |
| KU1228  | <i>ddr-1(ok874) ddr-2(ok574)</i>               | 14              | 67              | 21                | 0.042 <sup>b</sup>  |
| KU1227  | <i>ddr-2(ok574); Ex[Punc-25::ddr-1]</i>        | 21              | 54              | 39                | 0.856 <sup>b</sup>  |
| KU1202  | <i>ddr-2(ok574); Ex[Pddr-2::ddr-2]</i>         | 36              | 61              | 59                | 0.016 <sup>b</sup>  |
| KU1203  | <i>ddr-2(ok574); Ex[Punc-25::ddr-2]</i>        | 30              | 53              | 57                | 0.047 <sup>b</sup>  |
| KU1205  | <i>ddr-2(ok574); Ex[Punc-25::ddr-2(R100A)]</i> | 19              | 51              | 37                | 1 <sup>b</sup>      |
| KU1209  | <i>ddr-2(ok574); Ex[Punc25::ddr-2(K554E)]</i>  | 21              | 52              | 40                | 0.853 <sup>b</sup>  |
| KU1206  | <i>emb-9(g34)</i>                              | 26              | 62              | 42                | <0.001 <sup>a</sup> |
| KU1207  | <i>emb-9(g34); ddr-2(ok574)</i>                | 19              | 52              | 37                | 0.571 <sup>c</sup>  |
| KU1208  | <i>emb-9(g34); Ex[Punc-25::ddr-2]</i>          | 33              | 54              | 61                | 0.043 <sup>c</sup>  |
| KU1233  | <i>cle-1(cg120)</i>                            | 39              | 61              | 64                | 0.264 <sup>a</sup>  |
| KU1234  | <i>fmi-1(rh308)</i>                            | 38              | 52              | 73                | 1 <sup>a</sup>      |
| KU1235  | <i>nid-1(cg119)</i>                            | 42              | 59              | 71                | 0.845 <sup>a</sup>  |
| KU1229  | <i>ddr-2(ok574); Ex[Punc-25::ddr-2::gfp]</i>   | 40              | 58              | 69                | <0.001 <sup>b</sup> |
| KU504   | <i>mlk-1(km19)</i>                             | 17              | 54              | 31                | <0.001 <sup>a</sup> |
| KU1210  | <i>mlk-1(km19); ddr-2(ok574)</i>               | 18              | 54              | 33                | 1 <sup>d</sup>      |
| KU1211  | <i>ddr-2(ok574); Ex[Pmlk-1::mlk-1]</i>         | 35              | 52              | 67                | 0.001 <sup>b</sup>  |
| KU1212  | <i>mlk-1(km19); Ex[Punc-25::ddr-2]</i>         | 26              | 62              | 42                | 0.256 <sup>d</sup>  |
| KU502   | <i>svh-1(ok2531)</i>                           | 10 <sup>k</sup> | 41 <sup>k</sup> | 24 <sup>k</sup>   | -                   |
| KU1232  | <i>svh-1(ok2531); ddr-2(ok574)</i>             | 19              | 50              | 38                | 1 <sup>b</sup>      |
| KU503   | <i>svh-2(tm737)</i>                            | 22              | 78              | 28                | <0.001 <sup>a</sup> |
| KU1213  | <i>ddr-2(ok574) svh-2(tm737)</i>               | 19              | 63              | 30                | 0.471 <sup>b</sup>  |
| KU1231  | <i>ddr-2(ok574); Ex[Pjkk-1::svh-1]</i>         | 36              | 65              | 55                | 0.041 <sup>b</sup>  |
| KU1214  | <i>ddr-2(ok574); Ex[Punc-25::svh-2]</i>        | 36              | 66              | 55                | 0.044 <sup>b</sup>  |
| KU1230  | <i>svh-1(ok2531); Ex[Punc-25::ddr-2]</i>       | 22              | 61              | 36                | 0.278 <sup>f</sup>  |
| KU1215  | <i>svh-2(tm737); Ex[Punc-25::ddr-2]</i>        | 23              | 60              | 38                | 0.272 <sup>e</sup>  |
| KU1217  | <i>ddr-2(ok574); Ex[Pshc-1::shc-1]</i>         | 33              | 53              | 62                | 0.007 <sup>b</sup>  |
| KU1219  | <i>svh-2(tm737); Ex[Pshc-1::shc-1]</i>         | 15              | 51              | 29                | 1 <sup>e</sup>      |
| KU1218  | <i>ddr-2(ok574); Ex[Pshc-1::shc-1(R234K)]</i>  | 20              | 50              | 40                | 0.852 <sup>b</sup>  |
| KU1220  | <i>ddr-2(ok574); Ex[Pshc-1::shc-1(R136K)]</i>  | 38              | 53              | 72                | <0.001 <sup>b</sup> |
| KU501*  | wild type (24 hr after cutting)                | 43              | 60              | 72                | -                   |
| KU501** | wild type (72 hr after cutting)                | 46              | 63              | 73                | 1 <sup>g</sup>      |

|          |                                           |    |    |    |                     |
|----------|-------------------------------------------|----|----|----|---------------------|
| KU1226*  | <i>ddr-2(tm797)</i> (24 hr after cutting) | 20 | 69 | 29 | <0.001 <sup>a</sup> |
| KU1226** | <i>ddr-2(tm797)</i> (72 hr after cutting) | 31 | 54 | 57 | 0.002 <sup>h</sup>  |
| KU1206*  | <i>emb-9(g34)</i> (24 hr after cutting)   | 19 | 51 | 37 | -                   |
| KU1206** | <i>emb-9(g34)</i> (72 hr after cutting)   | 44 | 59 | 75 | <0.001 <sup>i</sup> |
| KU503*   | <i>svh-2(tm737)</i> (24 hr after cutting) | 18 | 51 | 35 | -                   |
| KU503**  | <i>svh-2(tm737)</i> (72 hr after cutting) | 25 | 51 | 49 | 0.22 <sup>j</sup>   |

a: vs wild type (KU501), b: vs *ddr-2* (KU1201), c: vs *emb-9* (KU1206), d: vs *mlk-1* (KU504),  
e: vs *svh-2* (KU503), f: vs *svh-1* (KU502), g: vs wild type (KU501\*), h: vs *ddr-2* (KU1226\*),  
i: vs *emb-9* (KU1206\*), j: vs *svh-2* (KU503\*), k: data from Ref. [7]
