# Supplementary material for: The C. elegans Discoidin Domain Receptor DDR-2 Modulates the Met-like RTK–JNK Signaling Pathway in Axon Regeneration
Source: PubMed Central journal article supplement (PMC5161311; doi:10.1371/journal.pgen.1006475), 2016-12-16
Supplement: pgen.1006475.s005.pdf [file pgen.1006475.s005.pdf]

**S2 Table**

---

|        |                                                                   |
|--------|-------------------------------------------------------------------|
| KU501  | <i>juls76 II.</i>                                                 |
| KU503  | <i>juls76 II; svh-2 (tm737) X.</i>                                |
| KU504  | <i>juls76 II; mlk-1(km19) V.</i>                                  |
| KU1201 | <i>juls76 II; ddr-2 (ok574) X.</i>                                |
| KU1202 | <i>juls76 II; ddr-2 (ok574) X; kmEx1201</i>                       |
| KU1203 | <i>juls76 II; ddr-2 (ok574) X; kmEx1202</i>                       |
| KU1205 | <i>juls76 II; ddr-2 (ok574) X; kmEx1204</i>                       |
| KU1206 | <i>juls76 II; emb-9(g34) III.</i>                                 |
| KU1207 | <i>juls76 II; emb-9(g34) III; ddr-2 (ok574)X.</i>                 |
| KU1208 | <i>juls76 II; emb-9(g34) III; kmEx1202</i>                        |
| KU1209 | <i>juls76 II; ddr-2 (ok574) X; kmEx1205</i>                       |
| KU1210 | <i>juls76 II; mlk-1(km19) V; ddr-2 (ok574) X.</i>                 |
| KU1211 | <i>juls76 II; ddr-2 (ok574) X; kmEx507</i>                        |
| KU1212 | <i>juls76 II; mlk-1(km19) V; kmEx1202</i>                         |
| KU1213 | <i>juls76 II; ddr-2 (ok574) svh-2 (tm737) X.</i>                  |
| KU1214 | <i>juls76 II; ddr-2 (ok574) X; kmEx1206</i>                       |
| KU1215 | <i>juls76 II; svh-2 (tm737) X; kmEx1202</i>                       |
| KU1217 | <i>juls76 II; ddr-2 (ok574) X; kmEx1181</i>                       |
| KU1218 | <i>juls76 II; ddr-2 (ok574) X; kmEx1207</i>                       |
| KU1219 | <i>juls76 II; svh-2 (tm737) X; kmEx1181</i>                       |
| KU1220 | <i>juls76 II; ddr-2 (ok574) X; kmEx1208</i>                       |
| KU1221 | <i>kmEx1209</i>                                                   |
| KU1222 | <i>kmEx1210</i>                                                   |
| KU1225 | <i>juls76 II; ddr-1(ok874) X.</i>                                 |
| KU1226 | <i>juls76 II; ddr-2(tm797) X.</i>                                 |
| KU1227 | <i>ddr-2 (ok574) X; kmEx1213</i>                                  |
| KU1228 | <i>ddr-1(ok874) ddr-2 (ok574) X.</i>                              |
| KU1229 | <i>juls76 II; ddr-2(ok574) X; kmEx1209</i>                        |
| KU1230 | <i>juls76 II; svh-1(ok2531) IV; kmEx1202</i>                      |
| KU1231 | <i>juls76 II; ddr-2(ok574) X; kmEx505</i>                         |
| KU1232 | <i>juls76 II; svh-1(ok2531) him-8 (e1489) IV; ddr-2(ok574) X.</i> |
| KU1233 | <i>cle-1(cg120) I; juls76 II.</i>                                 |
| KU1234 | <i>juls76 II; fmi-1(rh308) V.</i>                                 |
| KU1235 | <i>juls76 II; nid-1(cg119) V.</i>                                 |
| KU1236 | <i>kmEx1214</i>                                                   |

KU1237 *kmEx1215*

KU1238 *kmEx1216*

---
